# Supplementary material for: Program-Based Lung Cancer Care: A Prospective Observational Tumor Registry Linkage Study
Source: PubMed Central journal article supplement — JTO Clin Res Rep. 2023 Dec 26;5(2):100629. doi: 10.1016/j.jtocrr.2023.100629 (PMC10845058; doi:10.1016/j.jtocrr.2023.100629), 2023-12-26

**Supplemental Figure 1.** Evolution of Program-based care versus non-program-based care from 2011-2021, indicating an increasing trend in program-based care (trend  $p < 0.001$ ).

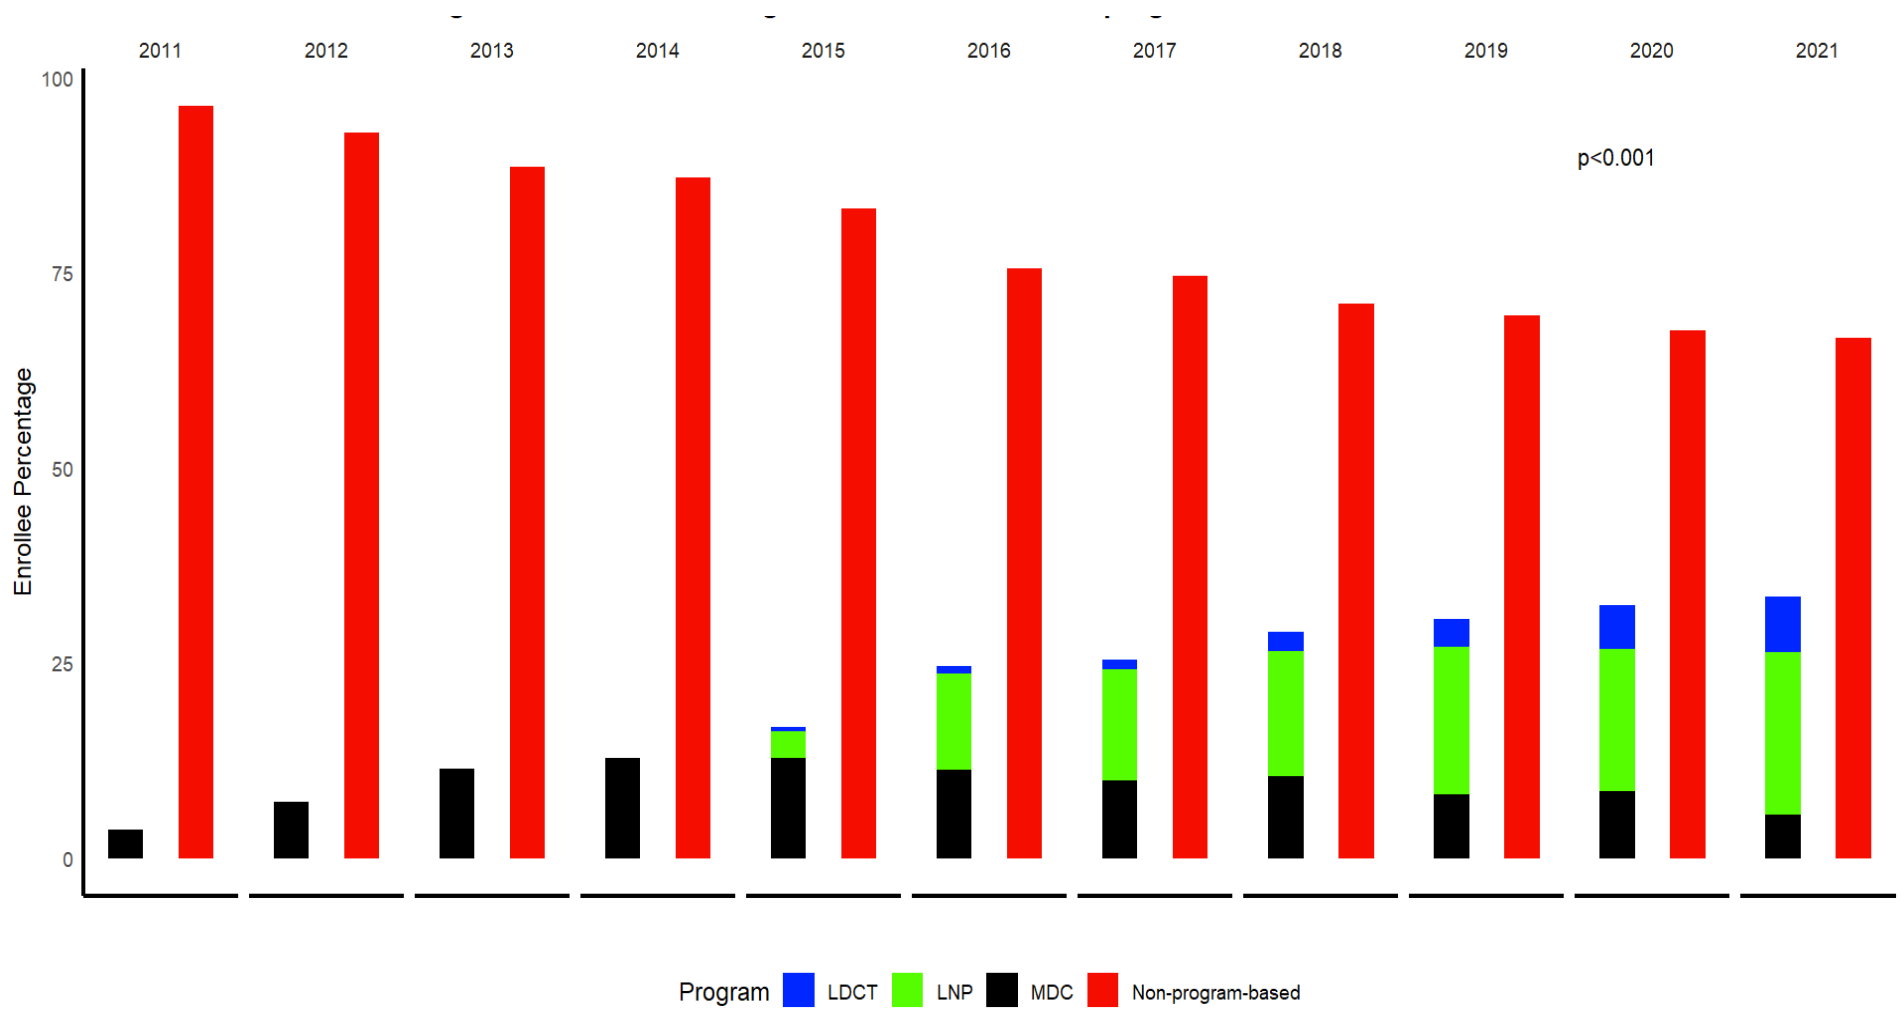

Supplement: mmc1.pdf [file mmc1.pdf]
