# Supplementary material for: Program-Based Lung Cancer Care: A Prospective Observational Tumor Registry Linkage Study
Source: PubMed Central journal article supplement — JTO Clin Res Rep. 2023 Dec 26;5(2):100629. doi: 10.1016/j.jtocrr.2023.100629 (PMC10845058; doi:10.1016/j.jtocrr.2023.100629), 2023-12-26

**Supplemental Figure 2a.** Kaplan-Meier plots for survival distribution by any program versus non-program-based care, 2011-2021.

Strata + Program-based + Non-program-based

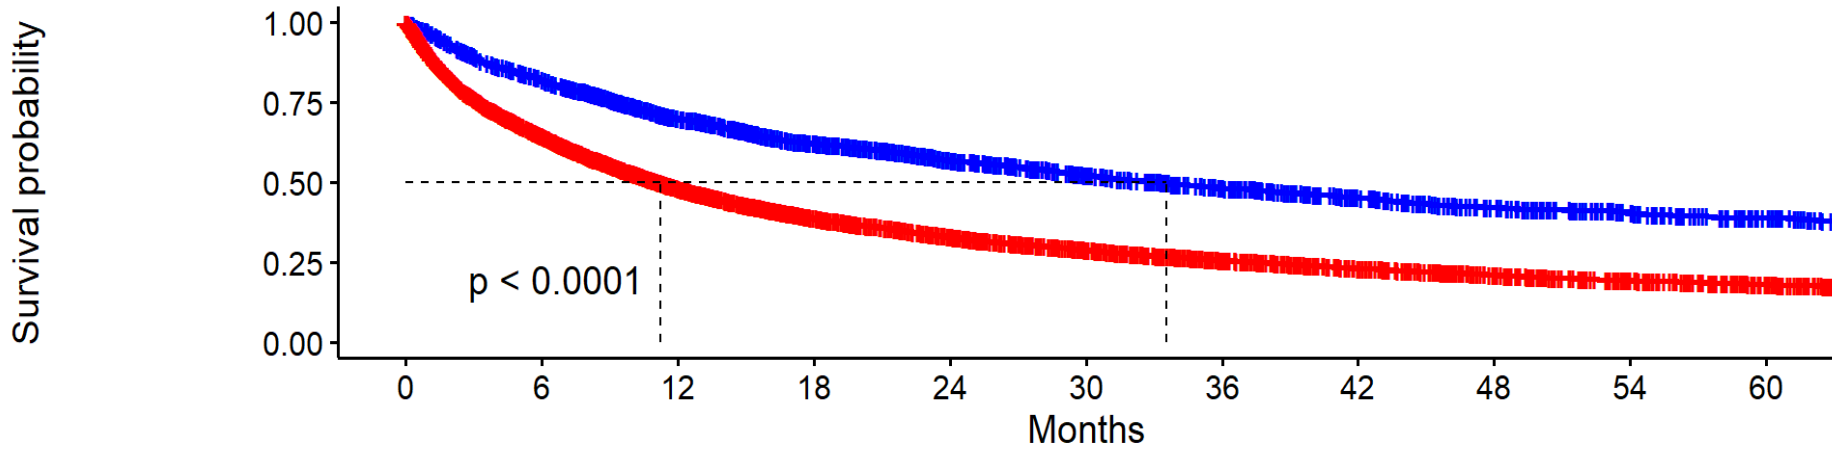

Number at risk

| Strata            | 0    | 6    | 12   | 18   | 24   | 30   | 36   | 42   | 48   | 54   | 60  |
|-------------------|------|------|------|------|------|------|------|------|------|------|-----|
| Program-based     | 2542 | 2017 | 1582 | 1262 | 1047 | 867  | 712  | 573  | 473  | 391  | 318 |
| Non-program-based | 9606 | 5896 | 4154 | 3124 | 2505 | 2072 | 1711 | 1421 | 1203 | 1027 | 877 |

Months

**Supplemental Figure 2b.** Kaplan-Meier plots for survival distribution by any program versus non-program-based care, 2015-2021.

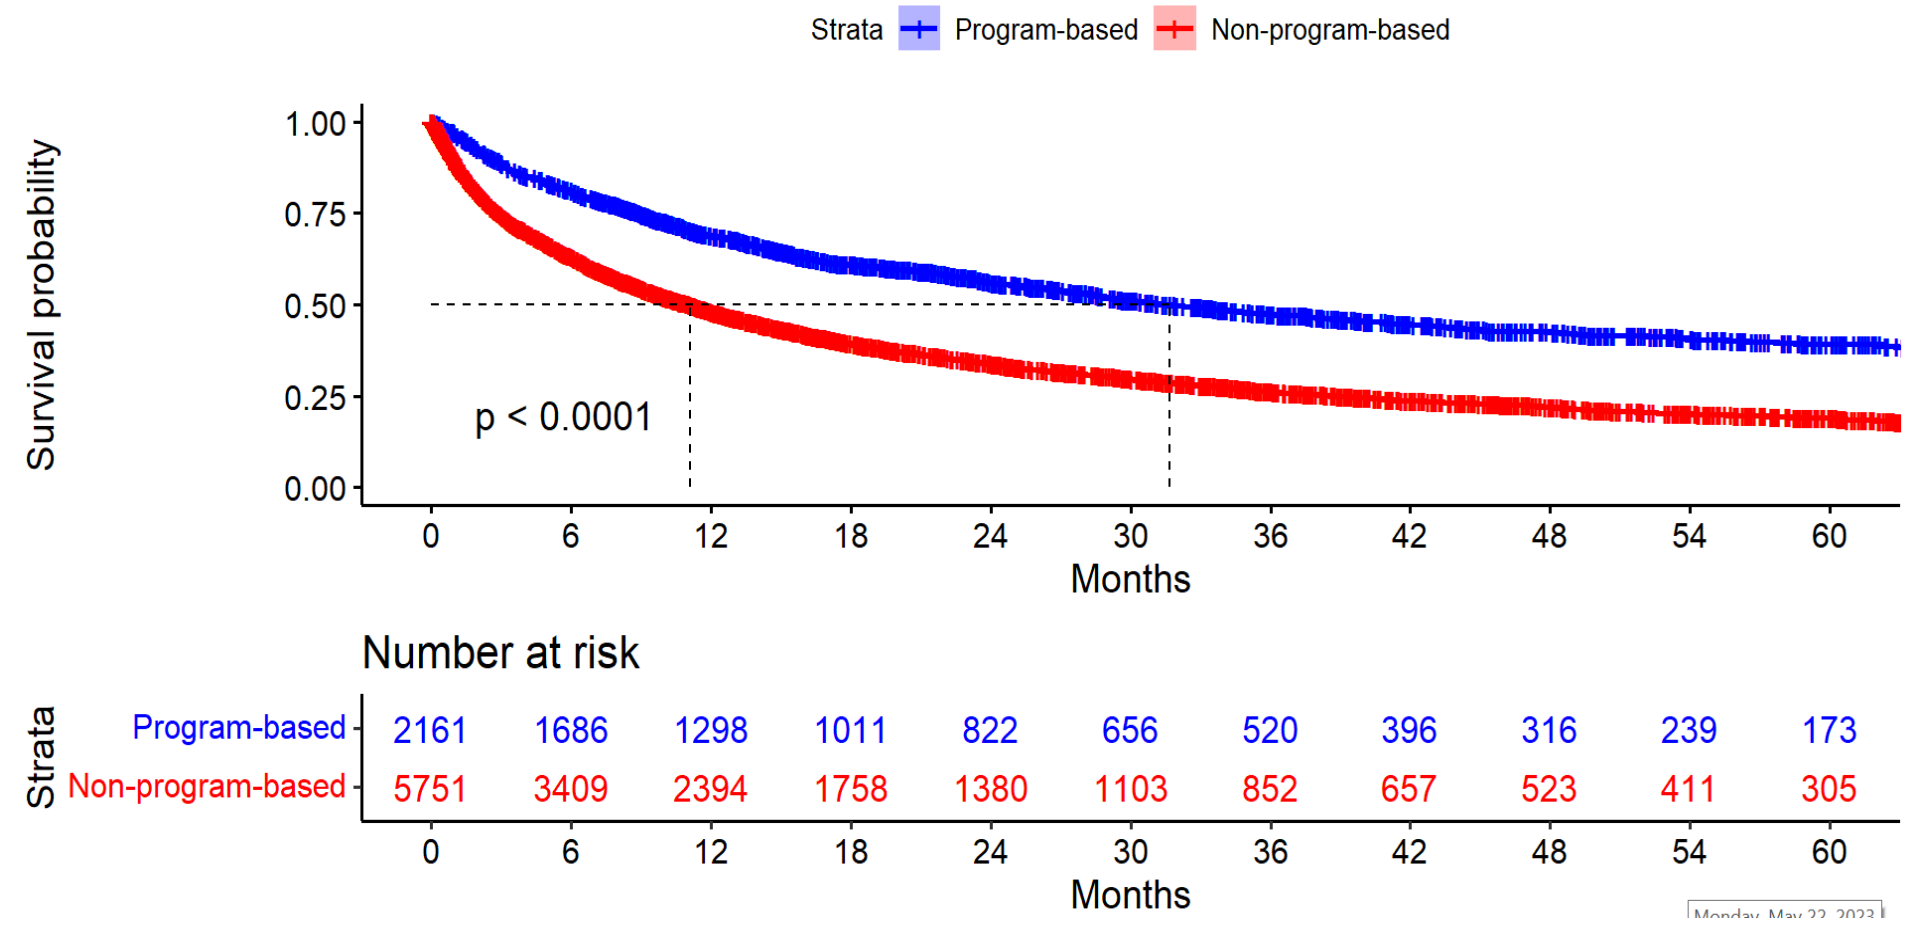

Supplement: mmc2.pdf [file mmc2.pdf]
